# Supplementary material
Source: PubMed Central journal article supplement (PMC2984220)
Supplement: 1014419107_pnas.201014419SI.pdf [file 1014419107_pnas.201014419SI.pdf]

# Supporting Information

Mao et al. 10.1073/pnas.1014419107

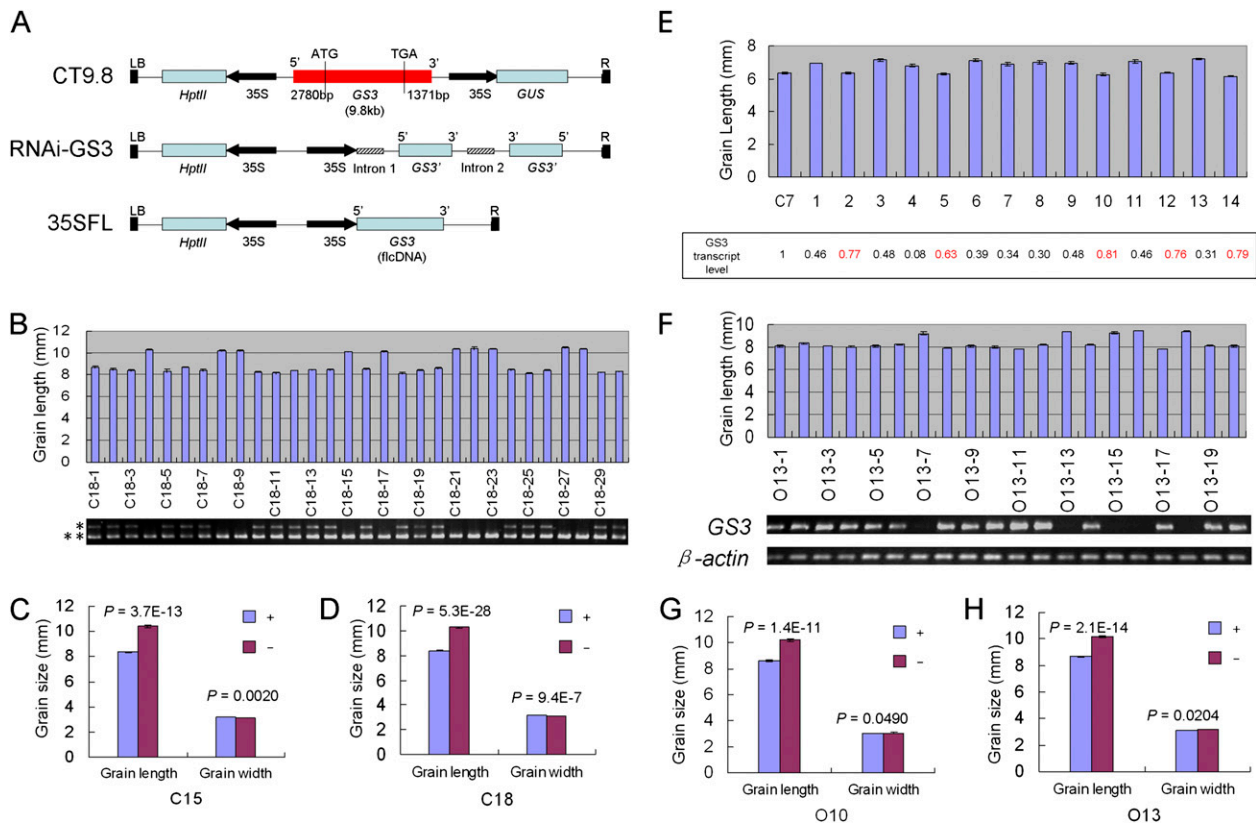

**Fig. S1.** Effects of transformation on grain size using three strategies. (A) Transformation constructs. CT9.8: the complementation construct in which GS3 fragment was amplified from Chuan 7 genome DNA and cloned into pCAMIA1301. RNAi-GS3: RNAi construct in which intron 1 is *Adh1* intron and intron 2 is rice *Waxy* gene intron. 35SFL: the overexpression construct, in which GS3 is under the control of CaMV 35S promoter. (B–D) Analysis of cosegregation between grain length and the transgene (CT.9.8). (B) Cosegregation between grain length and the transgene. Bottom: Genotype of T<sub>1</sub> segregants revealed by PCR amplification of the genomic DNA using a pair of primers, SF28 and SR17. The PCR product of the negative segregants is 1,065 bp (\*), and transgene has another band of 1,403 bp (\*\*). (C and D) Grain length and width of transgene-positive (+) and transgene-negative (–) plants in two T<sub>1</sub> families. All data are given as mean ± SEM. P values are generated using t tests. (E) Relationship of grain length and expression level of GS3 in the GS3-suppression (RNAi-GS3) plants of T<sub>1</sub> generation. Bottom: GS3 transcript level in T<sub>1</sub> segregants. The numbers in red represent the transcript level of negative segregants. C7 is the parent as a control. (F–H) Relationship of grain length and expression level of GS3 in the GS3-overexpression (35SFL) plants of T<sub>1</sub> generation. (F) Cosegregation between the transgene and grain length using a T<sub>1</sub> family as an example. Overexpression was detected in leaves using primers GS3F and GS4R, by which nonoverexpression segregants do not show clear bands because of low expression of the native gene.  $\beta$ -Actin was used as an internal control. (G and H) Grain length and width of transgene-positive (+) and transgene-negative (–) plants in two T<sub>1</sub> families. All data are given as mean ± SEM. P values are generated using t tests.

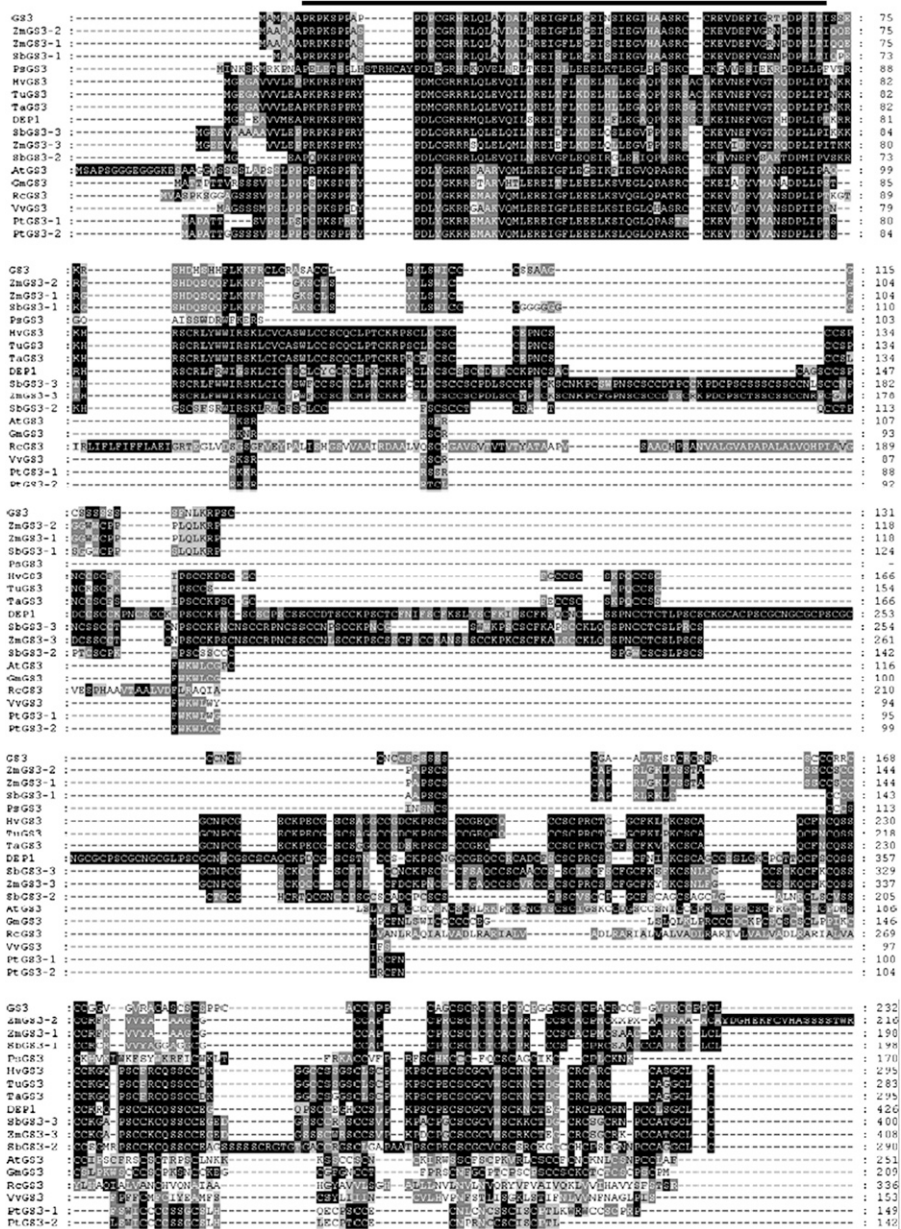

**Fig. S2.** Sequence alignment of GS3 and homologous proteins from different species. Black bar on the top indicates the highly conserved N-terminal region, which we named the OSR (organ size regulator) domain. Accession numbers are as follows: *ZmGS3-1*, *Zea mays*, ACZ02400; *ZmGS3-2*, NP\_001144472; *ZmGS3-3*, NP\_001152197; *SbGS3-1*, *Sorghum bicolor*, XP\_002465152; *SbGS3-2*, XP\_002444469; *SbGS3-3*, XP\_002460275; *DEP1*, *Oryza sativa*, BAD38070; *TuGS3*, *Triticum urartu*, ACT78691; *AtGS3*, *Arabidopsis thaliana*, NP\_680175; *TaGS3*, *Triticum aestivum*, ACI25444; *HvGS3*, *Hordeum vulgare*, ACI25445; *PtGS3-1*, *Populus trichocarpa*, XP\_002324141; *PtGS3-1*, XP\_002326287; *VvGS3*, *Vitis vinifera*, CBI27799; *RcGS3*, *Ricinus communis*, XP\_002326287; *GmGS3*, *Glycine max*, ACU19287; *PsGS3*, *Picea sitchensis*, ABK26455.

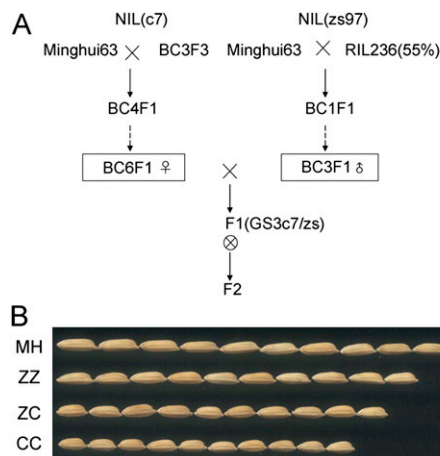

**Fig. S3.** Construction of NILs and their grains. (A) Process of near isogenic line (NIL) constructions. For developing NIL(c7), BC<sub>3</sub>F<sub>3</sub> was further backcrossed three times to Minghui 63 to get BC<sub>6</sub>F<sub>1</sub>. For making NIL(zs97), RIL236, a recombinant inbred line containing the chromosome segment RZ403-C1087 from Zhenshan 97 and 55% of the genetic background from Minghui 63, from a population of 240 RILs, was backcrossed three times to Minghui 63. The two resulting lines were crossed to produce F<sub>1</sub> (GS3c7/zs), which was self-pollinated to produce F<sub>2</sub>. (B) Grains of the NILs. CC, NIL(c7); ZZ, NIL(zs97); ZC, NIL(het); MH, Minghui63.

**Table S1.** Grain traits of segregants in a T<sub>1</sub> family of GS3-suppressed plants

| Genotype | No. plants | Grain length (mm)        | Grain width (mm) | 1,000-grain weight (g)  |
|----------|------------|--------------------------|------------------|-------------------------|
| Positive | 35         | 6.97 ± 0.02              | 2.49 ± 0.01      | 12.80 ± 0.08            |
| Negative | 13         | 6.28 ± 0.02              | 2.50 ± 0.01      | 11.65 ± 0.13            |
| <i>P</i> |            | 1.48 × 10 <sup>-25</sup> | 0.3566           | 1.01 × 10 <sup>-9</sup> |

All data are given as mean ± SEM. *P* values are the results of *t* tests.

**Table S2.** Comparison of yield traits of two independent transgenic lines (O10, O13) overexpressing GS3 with Minghui 63

| Traits                 | Minghui 63    | O10                      | O13                      |
|------------------------|---------------|--------------------------|--------------------------|
| Grain length (mm)      | 9.90 ± 0.01   | 8.73 ± 0.02              | 8.75 ± 0.02              |
| <i>P</i>               |               | 4.88 × 10 <sup>-46</sup> | 4.63 × 10 <sup>-44</sup> |
| Grain width (mm)       | 2.95 ± 0.01   | 2.98 ± 0.08              | 2.97 ± 0.01              |
| <i>P</i>               |               | 0.0349                   | 0.0812                   |
| 1,000-grain weight (g) | 27.95 ± 0.22  | 19.27 ± 0.19             | 20.25 ± 0.23             |
| <i>P</i>               |               | 2.66 × 10 <sup>-32</sup> | 3.49 × 10 <sup>-28</sup> |
| No. grains per panicle | 104.15 ± 2.47 | 45.56 ± 1.64             | 35.67 ± 2.39             |
| <i>P</i>               |               | 2.13 × 10 <sup>-24</sup> | 1.58 × 10 <sup>-24</sup> |
| No. tillers per plant  | 10.29 ± 0.73  | 14.21 ± 0.91             | 13.42 ± 0.60             |
| <i>P</i>               |               | 0.0008                   | 0.0009                   |
| No. days to heading    | 91.92 ± 0.43  | 91.21 ± 0.51             | 91.38 ± 0.42             |
| <i>P</i>               |               | 0.1450                   | 0.1837                   |

All data are given as mean ± SEM. Each *P* value is obtained from a *t* test between the transgenic line and Minghui 63 (*n* = 24 for each genotype).

**Table S3. Accessions of rice germplasm used for comparative sequencing**

| Accession ID* | Variety name      | Subspecies      | Country of origin | Grain length (mm) | Genotype |
|---------------|-------------------|-----------------|-------------------|-------------------|----------|
|               | Chuan 7           | <i>indica</i>   | China             | 6.4               | GS3-4    |
| W5-008        | Dandongludao      | <i>japonica</i> | China             | 7.6               | GS3-1    |
| W5-019        | Liushizao         | <i>indica</i>   | China             | 7.45              | GS3-1    |
| W5-023        | Jinxibai          | <i>indica</i>   | China             | 8.1               | GS3-1    |
| W5-024        | Jiefangxian       | <i>indica</i>   | China             | 8.6               | GS3-1    |
| W5-025        | Sanbaili          | <i>indica</i>   | China             | 8.3               | GS3-1    |
| W5-026        | Taisannuo         | <i>indica</i>   | China             | 7.65              | GS3-1    |
| W5-027        | Aihechi           | <i>indica</i>   | China             | 8.25              | GS3-1    |
| W5-028        | Aimi              | <i>indica</i>   | China             | 8.05              | GS3-1    |
| W5-030        | Jinbaoyin         | <i>japonica</i> | China             | 8.75              | GS3-1    |
| W5-031        | Minbeiwaxian      | <i>indica</i>   | China             | 8.25              | GS3-1    |
| W5-032        | Lucaihao          | <i>indica</i>   | China             | 7.05              | GS3-1    |
| W5-033        | Wukezhan          | <i>indica</i>   | China             | 7.85              | GS3-1    |
| W5-035        | Yanshuichi        | <i>indica</i>   | China             | 7.15              | GS3-1    |
| W5-037        | Simiao            | <i>indica</i>   | China             | 7.25              | GS3-1    |
| W5-038        | Esiniu            | <i>indica</i>   | China             | 7.95              | GS3-1    |
| W5-039        | Qimei             | <i>indica</i>   | China             | 7.9               | GS3-1    |
| W5-040        | Nanxiongzaoyou    | <i>indica</i>   | China             | 7.9               | GS3-1    |
| W5-041        | Baikehuoluo       | <i>indica</i>   | China             | 8.25              | GS3-1    |
| W5-042        | Heidu 4           | <i>indica</i>   | China             | 7.8               | GS3-1    |
| W5-046        | Hengxianliangchun | <i>indica</i>   | China             | 8.05              | GS3-1    |
| W5-047        | Aizaizhan         | <i>indica</i>   | China             | 7.7               | GS3-1    |
| W5-050        | Qiyuexian         | <i>indica</i>   | China             | 6.85              | GS3-1    |
| W5-053        | Dongtingwanxian   | <i>indica</i>   | China             | 8.5               | GS3-1    |
| W5-055        | Xuanenchangtan    | <i>indica</i>   | China             | 7.95              | GS3-1    |
| W5-056        | Bawangbian 1      | <i>japonica</i> | China             | 7.5               | GS3-1    |
| W5-057        | Baikezaohu        | <i>indica</i>   | China             | 8.3               | GS3-1    |
| W5-058        | Xugunuo           | <i>japonica</i> | China             | 7.5               | GS3-1    |
| W5-061        | Wanlixian         | <i>indica</i>   | China             | 8.1               | GS3-1    |
| W5-062        | Xiangdao          | <i>indica</i>   | China             | 7.95              | GS3-1    |
| W5-063        | Hanmadao          | <i>indica</i>   | China             | 8.05              | GS3-1    |
| W5-065        | Mamamgu           | <i>indica</i>   | China             | 7.95              | GS3-1    |
| W5-067        | Meihuanuo         | <i>indica</i>   | China             | 8.45              | GS3-1    |
| W5-068        | Zhongnong 4 hao   | <i>indica</i>   | China             | 7.75              | GS3-1    |
| W5-076        | Qitoubaidu        | <i>japonica</i> | China             | 8.2               | GS3-1    |
| W5-080        | Xianggu           | <i>japonica</i> | China             | 8.1               | GS3-1    |
| W5-081        | Xiaohonggu        | <i>japonica</i> | China             | 8                 | GS3-1    |
| W5-082        | Qingke            | <i>indica</i>   | China             | 7.8               | GS3-1    |
| W5-083        | Wuzidui           | <i>japonica</i> | China             | 7.05              | GS3-1    |
| W5-086        | Gongju 73         | <i>japonica</i> | China             | 8.15              | GS3-1    |
| W5-090        | Qitougu           | <i>indica</i>   | China             | 8.75              | GS3-1    |
| W5-094        | Mowanggunei       | <i>japonica</i> | China             | 7.35              | GS3-1    |
|               | Zhenshan 97       | <i>indica</i>   | China             | 8.2               | GS3-1    |
| W5-001        | Funingzipi        | <i>japonica</i> | China             | 7.75              | GS3-2    |
| W5-002        | Longhuamaohu      | <i>japonica</i> | China             | 8.45              | GS3-2    |
| W5-003        | Gaoyangdiandao    | <i>japonica</i> | China             | 8.25              | GS3-2    |
| W5-005        | Yelicanghua       | <i>japonica</i> | China             | 8.1               | GS3-2    |
| W5-010        | Laoguangtou 83    | <i>japonica</i> | China             | 6.75              | GS3-2    |
| W5-011        | Baimaodao         | <i>japonica</i> | China             | 8.2               | GS3-2    |
| W5-014        | Youmangzaojing    | <i>japonica</i> | China             | 6.85              | GS3-2    |
| W5-015        | Huangkezaogan     | <i>japonica</i> | China             | 7.2               | GS3-2    |
| W5-016        | Baigedao          | <i>japonica</i> | China             | 6.9               | GS3-2    |
| W5-018        | Tieganwu          | <i>japonica</i> | China             | 7.25              | GS3-2    |
| W5-022        | Feidongtangdao    | <i>japonica</i> | China             | 7.25              | GS3-2    |
| W5-029        | Hongmisandan      | <i>japonica</i> | China             | 6.6               | GS3-2    |
| W5-043        | Chikenuo          | <i>indica</i>   | China             | 8.25              | GS3-2    |
| W5-049        | Hongainuo         | <i>indica</i>   | China             | 7.85              | GS3-2    |
| W5-052        | Dongtingwanxian   | <i>indica</i>   | China             | 8.3               | GS3-2    |
| W5-059        | Muguanuo          | <i>japonica</i> | China             | 7.25              | GS3-2    |
| W5-060        | Hongqi 5 hao      | <i>japonica</i> | China             | 7.8               | GS3-2    |
| W5-064        | Xibaizhan         | <i>japonica</i> | China             | 7.9               | GS3-2    |
| W5-066        | Nantiangangjiu    | <i>japonica</i> | China             | 7                 | GS3-2    |

**Table S3. Cont.**

| Accession ID* | Variety name | Subspecies      | Country of origin | Grain length (mm) | Genotype |
|---------------|--------------|-----------------|-------------------|-------------------|----------|
| W5-069        | Honggu       | <i>indica</i>   | China             | 8                 | GS3-2    |
| W5-071        | Sanjiugu     | <i>japonica</i> | China             | 7.65              | GS3-2    |
| W5-072        | Haomake (K)  | <i>japonica</i> | China             | 8                 | GS3-2    |
| W5-077        | Benbangu     | <i>japonica</i> | China             | 8.3               | GS3-2    |
| W5-087        | Lengshuigu 2 | <i>japonica</i> | China             | 8.2               | GS3-2    |
| W5-089        | Lamujia      | <i>japonica</i> | China             | 7.8               | GS3-2    |
| W5-092        | Yuyannuo     | <i>japonica</i> | China             | 7.7               | GS3-2    |
|               | Nipponbare   | <i>japonica</i> | Japan             | 7.3               | GS3-2    |
|               | Zhonghua 11  | <i>japonica</i> | China             | 7.5               | GS3-2    |
| W5-017        | Cunsanli     | <i>japonica</i> | China             | 9.6               | GS3-3    |
| W5-044        | Sanlicun     | <i>japonica</i> | China             | 9.45              | GS3-3    |
| W5-075        | Sanqishi     | <i>japonica</i> | China             | 9.15              | GS3-3    |
| W5-078        | Dawannuo     | <i>indica</i>   | China             | 9.5               | GS3-3    |
| W5-079        | Zimi         | <i>japonica</i> | China             | 9.35              | GS3-3    |
| W5-091        | Zinuo        | <i>indica</i>   | China             | 9.3               | GS3-3    |
|               | Minghui 63   | <i>indica</i>   | China             | 10.1              | GS3-3    |
| W5-021        | Leihuozhan   | <i>indica</i>   | China             | 9.15              | GS3-3    |
| W5-054        | Liuyezhan    | <i>indica</i>   | China             | 9                 | GS3-3    |
| W5-070        | Sankecun     | <i>indica</i>   | China             | 9.6               | GS3-3    |
| W5-074        | Haobuka      | <i>japonica</i> | China             | 9.65              | GS3-3    |

\*Rice accession ID from core collection of Chinese rice germplasm.

**Table S4. Comparison of grain length between accessions with or without the TCC insertion**

| Group   | TCC insertion | No. of accessions | Grain length (mm) | <i>t</i> | <i>P</i> |
|---------|---------------|-------------------|-------------------|----------|----------|
| Group 1 | With          | 2                 | 7.33 ± 0.28       | 0.7191   | 0.2393   |
|         | Without       | 25                | 7.61 ± 0.11       |          |          |
| Group 2 | With          | 40                | 7.94 ± 0.07       | 0.2932   | 0.3854   |
|         | Without       | 3                 | 8.02 ± 0.14       |          |          |

Data of grain length are given as mean ± SEM. *P* value is obtained from a *t* test.

**Table S5. Measurements of yield component traits of the near isogenic lines in comparison with Minghui 63 from field trial**

|                        | NIL (c7)         | NIL (het)       | NIL(zs97)        | Minghui 63      |
|------------------------|------------------|-----------------|------------------|-----------------|
| No. grains per panicle | 113.08 ± 6.08 ab | 123.60 ± 4.80 a | 117.62 ± 5.31 ab | 105.60 ± 4.20 b |
| No. tillers per plant  | 5.92 ± 0.36 Aa   | 7.58 ± 0.36 Ab  | 8.54 ± 0.51 Bb   | 8.90 ± 0.53 Bb  |
| Yield per plant (g)    | 10.68 ± 0.95 A   | 16.05 ± 1.00 Ba | 18.71 ± 1.54 Bab | 22.09 ± 1.44 Cb |
| 1,000-grain weight (g) | 18.42 ± 0.19 A   | 20.82 ± 0.16 B  | 22.80 ± 0.41 C   | 26.78 ± 0.39 D  |
| Grain length (mm)      | 7.57 ± 0.04 A    | 8.23 ± 0.02 B   | 9.02 ± 0.03 C    | 9.85 ± 0.03 D   |
| Grain width (mm)       | 3.07 ± 0.01 bc   | 3.08 ± 0.01 cd  | 3.05 ± 0.01 ab   | 3.04 ± 0.01 a   |

All data are given as mean ± SEM. A, B, C, D: ranked by Duncan test at *P* ≤ 0.01; a, b, c, d: ranked by Duncan test at *P* ≤ 0.05.

**Table S6. Primers used in this study**

| Primer name  | Sequence                                     | Purpose                |
|--------------|----------------------------------------------|------------------------|
| 9247r        | 5'-GAGGTACCACGCACTTGCTCTGCACAAACAGCT-3'      | Vector construction    |
| 1512f        | 5'-TGGGTACCCAAAAGTCCGAGATTTGTCACATT-3'       | Vector construction    |
| U9EcoRIF     | 5'-AGGGTTGACGAATTCATCGGAAGAAGTCCCTGAT-3'     | Vector construction    |
| RBP          | 5'-AGTTAAGCTTAGGTCCCTTTTCTCGTCCTCGA-3'       | Vector construction    |
| F1Sacl       | 5'-CATCATgagctcTATCGGAACTTCGGAGTGACATGGCA-3' | Vector construction    |
| VWFKpnl      | 5'-TTTggatccTTAACACGGACTCTTCGTTAACGCCGCC-3'  | Vector construction    |
| DelPEcoRIR   | 5'-CCGAATTCGCCGCCGCCATTGCCATGTCA-3'          | Vector construction    |
| DelVMIuIR    | 5'-TATACGCGTGGAGCAGCTGCAGCTCGCGCAGC-3'       | Vector construction    |
| DelVMIuIF    | 5'-ACGCGTTAGTGTGATCGATCGATTGA-3'             | Vector construction    |
| DelTMIuIR    | 5'-TATAACGCGTTGAGCAGCCGCCGCGCGCT-3'          | Vector construction    |
| DelTMIuIF    | 5'-ACGCGTTAACGAAGAGTCCGTGTGC-3'              | Vector construction    |
| PVMIuIF      | 5'-TGGACGCGTGCAGCAGCAGCTTGTCTGCACA-3'        | Vector construction    |
| VMIuIR       | 5'-TTACGCGTCCGCCGCCATTGCCATGTCA-3'           | Vector construction    |
| 3UTRMIuIR    | 5'-acgcgtAGTACGCGCAGCTCGATCGATCA-3'          | Vector construction    |
| 3UTRMIuIF    | 5'-acgcgtTAATTAGCTAGCTAGGTTCTGGTGT-3'        | Vector construction    |
| F-ExHindIIIR | 5'-gaagcttTCATCGATCGATCGATCACA-3'            | Vector construction    |
| CFPXbalF     | 5'-GGGtctagaCGGAGTGACATGGCAATGGC-3'          | Vector construction    |
| GUS1.6R      | 5'-GAGTGAAGATCCCTTTCTTGTACCG-3'              | Positive test          |
| GUS1.6F      | 5'-CCAGGAGTTTTAACGATCAGTTCGC-3'              | Positive test          |
| PMCGR        | 5'-CTGAGCTACACATGCTCAGGTT-3'                 | Positive test          |
| PMCGF        | 5'-GGCTACCAAACCTTAAACAA-3'                   | Positive test          |
| dsF1         | 5'-CCGCGAGATCGGATTCC-3'                      | Expression analysis    |
| dsR1         | 5'-CGTGGATCCCTTCGATTGA-3'                    | Expression analysis    |
| G53F         | 5'-GAACTCTGATCCATTACATAACGATT-3'             | Expression analysis    |
| G53R         | 5'-CAAACAGCGAAACTTCTCAAGAA-3'                | Expression analysis    |
| Actin1F      | 5'-TGGCATCTCTCAGCACCATTCC-3'                 | Expression analysis    |
| Actin1R      | 5'-TGCACAATGGATGGGTGAGA-3'                   | Expression analysis    |
| SF18         | 5'-CCTTCAGTAAGAGAGATGTG-3'                   | Comparative sequencing |
| SR18         | 5'-AGTTGATGGTTTTGTGGAT-3'                    | Comparative sequencing |
| GS64F        | 5'-CAACACCAGCAACGAACAAC-3'                   | Comparative sequencing |
| GS64R        | 5'-ACGAGGGATTATCAGCCATT-3'                   | Comparative sequencing |
| SF46         | 5'-ACTTTGACCTTGACTACTCGT 3'                  | Comparative sequencing |
| SR46         | 5'-AGCATCTGGAGGCAGCGTGA 3'                   | Comparative sequencing |
| SF47         | 5'-AGTCCGTGCTATAGCTGACT-3'                   | Comparative sequencing |
| GS3F         | 5'- TGACGAATTCATCGGAAGAACT-3'                | Comparative sequencing |
| race3f       | 5'-TGGTCCACGCTAGTTTTCTGAGTTCTG-3'            | Comparative sequencing |
| SF16         | 5'-CGAATAGGAAGTCAATGGC-3'                    | Comparative sequencing |
| SR16         | 5'-GAGAGAGAAGAGCAGCGGA-3'                    | Comparative sequencing |
| SF17         | 5'-TGGCTTGATTTCTGTGC-3'                      | Comparative sequencing |
| SR17         | 5'-TGTTCTGTTGCTGGTGTG-3'                     | Comparative sequencing |
| SF28         | 5'-TGCCCATCTCCCTCGTTTAC-3'                   | Comparative sequencing |
| SR28         | 5'-GTTGTTCTGTTGCTGGTGTG-3'                   | Comparative sequencing |
| SF29         | 5'-TCCCACAAAACCATCAACTT-3'                   | Comparative sequencing |
| SR29         | 5'-AACCCATATCAGCCAAA-3'                      | Comparative sequencing |
| SF45         | 5'-AACCTTCTCTTACCTT-3'                       | Comparative sequencing |
| SR45         | 5'-TCAGCAATCACGTAATCATC-3'                   | Comparative sequencing |
